# Supplementary material for: Measuring beyond content: a rubric bank for assessing skills in authentic research assignments in the sciences
Source: Royal Society of Chemistry journal article supplement (doi:10.1039/c2rp00023g), 2012-01-01
Supplement: c2rp00023g.pdf [file c2rp00023g.pdf]

## Faculty Survey Free Responses

### What has been the most significant impact of the rubric bank on your teaching?

Clarity of goals and efficiency of assessing student work. I have a renewed appreciation for how important it is to clearly lay out objectives. Given the usual time constraints of teaching, the faster grading afforded by rubrics is invaluable.

Clarity of expectations. Ease of grading.

Clarifying learning objectives for each assignment.

Grading is easier and causes more satisfaction - my end as well as student (less complaining)

### What has been the most significant impact of the rubric bank on your students' learning?

I think they appreciate understanding more clearly what we expect from them. This can result in them focusing their efforts more on what we really think is important for them to learn.

clarity of expectations

understanding what I am looking for. Also, peicing apart their learning to skills and concepts (metacognitive awareness); and learning the nature of science in context

Quicker growth curve from weak to strong communication

### Are there ways in which the rubric bank has had a negative impact on your teaching/student learning?

I tend to give fewer personalized comments, which can be helpful for students. Also, increased speed of grading can translate into less reflection on the student's assignment (on my part)

not that I can think of

less specific feedback. Difficulty explaining the expectations the first time through (many of the 'strongest students' (e.g. honor's students) didn't do well on the first run)

I may avoid extremes (high A's and low D's) more - perhaps clumping around the center, but I don't know if this is true.

### Did you attend an inter-rater reliability testing session?

yes

yes

yes

yes

### If so, did that session alter your approach to using the rubrics? In what way?

It did alter how I interpret some of the items

I realized interdisciplinary differences

## Faculty Survey Free Responses

Simplify!!! (e.g. use fewer items per assignment)

I understood some of the parameters better so could use them

### **Did that session improve your confidence in using the rubrics?**

Yes, I was more confident when I knew that I was understanding the items in the same way as the others. It did raise a caution for me when rubrics are used without clarifying what items mean (and how they are scored)

yes

yes

yes - it was nice to know that others also thought work was 'competent'

### **For how many assignments, in how many courses, have you used the rubric bank?**

3 classes; 2 assignments per class

4 classes, 1 - 2 assignments per class

5 classes; 1-4 assignments per class

3 classes; 2 - 8 assignments per class
