# Supplementary material for: Measuring beyond content: a rubric bank for assessing skills in authentic research assignments in the sciences
Source: Royal Society of Chemistry journal article supplement (doi:10.1039/c2rp00023g), 2012-01-01
Supplement: c2rp00023g_2.pdf [file c2rp00023g_2.pdf]

Faculty Survey Responses

| <u>Item</u>                                                                                                                                                    |          |          |          |          | <u>Mean</u> | <u>Stdev</u> | <u>(comments)</u>                 |
|----------------------------------------------------------------------------------------------------------------------------------------------------------------|----------|----------|----------|----------|-------------|--------------|-----------------------------------|
| <b>Use of the rubric bank made grading faster and easier than my previous grading method</b>                                                                   | <b>4</b> | <b>4</b> | <b>5</b> | <b>5</b> | <b>4.5</b>  | <b>0.6</b>   |                                   |
| Using the rubric bank allows me to give more detailed feedback than my previous grading method                                                                 | 3        | 4        | 4        | 4        | 3.8         | 0.5          |                                   |
| <b>Use of the rubric bank allows me to give more concise feedback than my previous grading method</b>                                                          | <b>4</b> | <b>5</b> | <b>5</b> | <b>5</b> | <b>4.8</b>  | <b>0.5</b>   |                                   |
| <b>Use of the rubric bank has fostered more reflection on my own teaching than my previous grading method</b>                                                  | <b>5</b> | <b>4</b> | <b>5</b> | <b>4</b> | <b>4.5</b>  | <b>0.6</b>   |                                   |
| I am now more likely to assign an applied/authentic research project than I would have been before we developed the rubric bank                                | 2        | 4        | 2        | 3        | 2.8         | 1.0          | (D: Already plenty of reason to!) |
| <b>Because of my use of the rubric bank, student research products (e.g. papers and posters) in my courses have improved</b>                                   | <b>4</b> | <b>4</b> | <b>4</b> | <b>5</b> | <b>4.3</b>  | <b>0.5</b>   |                                   |
| <b>Because of my use of the rubric bank, my students more clearly understand my teaching objectives</b>                                                        | <b>5</b> | <b>5</b> | <b>4</b> | <b>4</b> | <b>4.5</b>  | <b>0.6</b>   |                                   |
| <b>I fail to see the reason for using rubrics</b>                                                                                                              | <b>1</b> | <b>1</b> | <b>1</b> | <b>1</b> | <b>1.0</b>  | <b>0.0</b>   |                                   |
| <b>Because of my use of the rubric bank, students have a greater meta-cognitive awareness (e.g. they can better differentiate skills and concepts)</b>         | <b>4</b> | <b>4</b> | <b>4</b> | <b>4</b> | <b>4.0</b>  | <b>0.0</b>   |                                   |
| Because of my use of the rubric bank, students demonstrate better learning of the course content                                                               | 4        | 4        | 2        | 4        | 3.5         | 1.0          |                                   |
| Because of my use of the rubric bank, students demonstrate greater higher order cognitive skills (such as analysis, synthesis and evaluation)                  | 4        | 3        | 4        | 4        | 3.8         | 0.5          |                                   |
| Because of my use of the rubric bank, students demonstrate more correct conceptions of the nature of science                                                   | 4        | 3        | 4        | 3        | 3.5         | 0.6          |                                   |
| <b>Because of my use of the rubric bank, students demonstrate better scientific communication skills</b>                                                       | <b>4</b> | <b>4</b> | <b>5</b> | <b>5</b> | <b>4.5</b>  | <b>0.6</b>   |                                   |
| <b>Because of our use of the rubric bank, EMU science student research products (research papers, poster, and oral presentations) have improved in quality</b> | <b>4</b> | <b>4</b> | <b>4</b> | <b>5</b> | <b>4.3</b>  | <b>0.5</b>   |                                   |
| <b>Our using the rubric bank has improved our overall undergraduate training program</b>                                                                       | <b>4</b> | <b>4</b> | <b>4</b> | <b>5</b> | <b>4.3</b>  | <b>0.5</b>   |                                   |
| <b>Using the rubric bank has not improved my teaching</b>                                                                                                      | <b>2</b> | <b>1</b> | <b>1</b> | <b>1</b> | <b>1.3</b>  | <b>0.5</b>   |                                   |
