# Supplementary material for: Measuring beyond content: a rubric bank for assessing skills in authentic research assignments in the sciences
Source: Royal Society of Chemistry journal article supplement (doi:10.1039/c2rp00023g), 2012-01-01
Supplement: c2rp00023g_3.pdf [file c2rp00023g_3.pdf]

## Rubric for Oral Presentations

| Competency                                             | 5                                                                                                                                                                                                                                                                                                                                                                                                                                                     | 4 | 3                                                                                                                                                                                                                                                                                                                                                                                                            | 2 | 1                                                                                                                                                                                                                                                                                                                                                           |
|--------------------------------------------------------|-------------------------------------------------------------------------------------------------------------------------------------------------------------------------------------------------------------------------------------------------------------------------------------------------------------------------------------------------------------------------------------------------------------------------------------------------------|---|--------------------------------------------------------------------------------------------------------------------------------------------------------------------------------------------------------------------------------------------------------------------------------------------------------------------------------------------------------------------------------------------------------------|---|-------------------------------------------------------------------------------------------------------------------------------------------------------------------------------------------------------------------------------------------------------------------------------------------------------------------------------------------------------------|
| <b>Application:<br/>Data<br/>Presentation<br/>Oral</b> | <ul style="list-style-type: none"> <li>Highly consistent and appropriate use of scientific units of measurement, labels, symbols, and equations.</li> <li>Concise visuals convey pertinent data that are otherwise difficult to convey; thus, increasing the efficiency and effectiveness of the presentation.</li> <li>Visuals enhance the communication process by utilizing the appropriate balance between effective visuals and text.</li> </ul> |   | <ul style="list-style-type: none"> <li>Consistent use of scientific labels, units of measurement, symbols, and equations.</li> <li>Minor inaccuracies or omissions noted, such as skipping a step, inaccurate equation (e.g., lack of labels, typographical errors, etc.)</li> <li>Visuals convey data that are pertinent and add to the presentation, with some balance between text and visuals</li> </ul> |   | <ul style="list-style-type: none"> <li>Does not attempt to use scientific labels, symbols, or equations.</li> <li>Major inaccuracies or omissions are noted.</li> <li>Visuals distract from presentation by being too wordy or too limited (e.g., too much text or visual)</li> </ul>                                                                       |
| <b>Oral:<br/>Organization &amp;<br/>Sequence</b>       | <ul style="list-style-type: none"> <li>Clearly organized and logical using format of commonly accepted scientific literature.</li> <li>Explicitly differentiates main from secondary ideas.</li> </ul>                                                                                                                                                                                                                                                |   | <ul style="list-style-type: none"> <li>Organized, using clear divisions of the segments within the presentation.</li> <li>Main ideas are emphasized.</li> </ul>                                                                                                                                                                                                                                              |   | <ul style="list-style-type: none"> <li>Format is disorganized.</li> <li>Main ideas are lost</li> </ul>                                                                                                                                                                                                                                                      |
| <b>Oral<br/>Presentation<br/>Skills</b>                | <ul style="list-style-type: none"> <li>Exhibits exemplary professional demeanor</li> <li>High level of poise</li> <li>Communicates high level of preparation for the presentation.</li> <li>Communicates an enthusiasm or strong scholarly interest in the subject matter.</li> <li>Handles questions from the audience with confidence</li> <li>Rate of speech (or presentation) facilitates audience understanding</li> </ul>                       |   | <ul style="list-style-type: none"> <li>Exhibits professional demeanor</li> <li>Maintains composure throughout the presentation.</li> <li>Communicates competent level of preparation.</li> <li>Communicates a desire to perform well</li> <li>Communicates willingness to interact with the audience.</li> <li>Rate of speech (or presentation) does not detract from audience understanding</li> </ul>      |   | <ul style="list-style-type: none"> <li>Does not exhibit professional demeanor</li> <li>Composure is lost during presentation.</li> <li>Seems unprepared</li> <li>Communicates little interest in the subject matter.</li> <li>Lackadaisical attitude is evident.</li> <li>Rate of speech (or presentation) detracts from audience understanding.</li> </ul> |
