# Supplementary material for: Measuring beyond content: a rubric bank for assessing skills in authentic research assignments in the sciences
Source: Royal Society of Chemistry journal article supplement (doi:10.1039/c2rp00023g), 2012-01-01
Supplement: c2rp00023g_4.pdf [file c2rp00023g_4.pdf]

## STEM Scholarship Poster Rubric

| Competency                                                                                                                                                    | 5                                                                                                                                                                                                                                                                                                                                                                                                                                                     | 4 | 3                                                                                                                                                                                                                                                                                                                                                                                                             | 2 | 1                                                                                                                                                                                                                                                                                                     |
|---------------------------------------------------------------------------------------------------------------------------------------------------------------|-------------------------------------------------------------------------------------------------------------------------------------------------------------------------------------------------------------------------------------------------------------------------------------------------------------------------------------------------------------------------------------------------------------------------------------------------------|---|---------------------------------------------------------------------------------------------------------------------------------------------------------------------------------------------------------------------------------------------------------------------------------------------------------------------------------------------------------------------------------------------------------------|---|-------------------------------------------------------------------------------------------------------------------------------------------------------------------------------------------------------------------------------------------------------------------------------------------------------|
| <b>Content Knowledge: Accuracy of scientific understanding</b>                                                                                                | <ul style="list-style-type: none"> <li>Reflects well-developed understanding of current scientific theory and concepts.</li> <li>Explicitly summarizes essential background information.</li> </ul>                                                                                                                                                                                                                                                   |   | <ul style="list-style-type: none"> <li>Reflects understanding of current scientific theory and concepts.</li> <li>Summarizes most of the essential background</li> </ul>                                                                                                                                                                                                                                      |   | <ul style="list-style-type: none"> <li>Reflects inaccuracies or large gaps in understanding of current scientific theory and concepts.</li> <li>Does not summarize essential background and information</li> </ul>                                                                                    |
| <b>Analysis: Identifies Rationale/Hypothesis</b>                                                                                                              | <ul style="list-style-type: none"> <li>Very clearly identifies a hypothesis, rationale, or clarifies a systematic approach for exploration</li> <li>Explicitly draws support for his/her rationale from experience, observation, and/or the literature base.</li> <li>Most variables are thoughtfully identified.</li> <li>Explicit link of current theory to the individual's own research study.</li> </ul>                                         |   | <ul style="list-style-type: none"> <li>Identifies a hypothesis, rationale, or approach for exploration</li> <li>Limited support for the rationale</li> <li>Some variables are identified.</li> <li>Links current theory to the individual's own research study (may be implied or vague).</li> </ul>                                                                                                          |   | <ul style="list-style-type: none"> <li>Hypothesis, rationale, or line of inquiry is not identified or has inconsistencies.</li> <li>Does not support rationale</li> <li>Variables are inadequately addressed</li> <li>Does not link current theory to the individual's own research study.</li> </ul> |
| <b>Synthesis: Design of Methodology</b>                                                                                                                       | <ul style="list-style-type: none"> <li>Clear and complete description of steps that will achieve the purpose of the research study and allow for replication of the study.</li> </ul>                                                                                                                                                                                                                                                                 |   | <ul style="list-style-type: none"> <li>Description of steps for research study is included.</li> </ul>                                                                                                                                                                                                                                                                                                        |   | <ul style="list-style-type: none"> <li>Methodology is confusing or contains gaps.</li> <li>Methodology will not achieve the intended purpose of the study.</li> <li>Does not include description of steps for research study.</li> </ul>                                                              |
| <b>Application: Data Presentation: Scientific Poster</b>                                                                                                      | <ul style="list-style-type: none"> <li>Highly consistent and appropriate use of scientific units of measurement, labels, symbols, and equations.</li> <li>Concise visuals convey pertinent data that are otherwise difficult to convey; thus, increasing the efficiency and effectiveness of the presentation.</li> <li>Visuals enhance the communication process by utilizing the appropriate balance between effective visuals and text.</li> </ul> |   | <ul style="list-style-type: none"> <li>Consistent use of scientific labels, units of measurement, symbols, and equations.</li> <li>Minor inaccuracies or omissions noted, such as skipping a step, inaccurate equation (e.g., lack of labels, typographical errors, etc.)</li> <li>Visuals convey data that are pertinent and add to the presentation, with some balance between text and visuals.</li> </ul> |   | <ul style="list-style-type: none"> <li>Does not attempt to use scientific labels, symbols, or equations.</li> <li>Major inaccuracies or omissions are noted.</li> <li>Visuals distract from presentation by being too wordy or too limited (e.g., too much text or visual)</li> </ul>                 |
| <b>Synthesis: Conclusions</b>                                                                                                                                 | <ul style="list-style-type: none"> <li>Clearly addresses the research question(s).</li> <li>Draws inferences that are highly consistent with the data and scientific reasoning</li> </ul>                                                                                                                                                                                                                                                             |   | <ul style="list-style-type: none"> <li>Addresses the research question(s).</li> <li>Identifies conclusions based on observation.</li> </ul>                                                                                                                                                                                                                                                                   |   | <ul style="list-style-type: none"> <li>Conclusions do not address the research question(s).</li> <li>Conclusions not evaluated for accuracy and precision.</li> </ul>                                                                                                                                 |
| <b>Evaluation: Relevance (NOS: Social and Cultural)</b>                                                                                                       | <ul style="list-style-type: none"> <li>Clearly articulates scientific and societal relevance of the study.</li> </ul>                                                                                                                                                                                                                                                                                                                                 |   | <ul style="list-style-type: none"> <li>Identifies a general relevance of the study.</li> </ul>                                                                                                                                                                                                                                                                                                                |   | <ul style="list-style-type: none"> <li>Does not identify the relevance of the study.</li> </ul>                                                                                                                                                                                                       |
| <b>Inferential NOS: The crucial distinction between scientific claims (e.g., inferences) and evidence on which such claims are based (e.g., observations)</b> | <ul style="list-style-type: none"> <li>Inferences are made appropriately and well-justified:</li> <li>Clearly shows evidence of the distinction between scientific claims and evidence on which claims are based.</li> </ul>                                                                                                                                                                                                                          |   | <ul style="list-style-type: none"> <li>Inferences are made but not well-justified:</li> <li>Shows evidence of the distinction between inference and observation.</li> </ul>                                                                                                                                                                                                                                   |   | <ul style="list-style-type: none"> <li>Inferences are not made, or are not justified:</li> <li>Does not distinguish between inference and observations</li> </ul>                                                                                                                                     |
