# Supplementary material for: Measuring beyond content: a rubric bank for assessing skills in authentic research assignments in the sciences
Source: Royal Society of Chemistry journal article supplement (doi:10.1039/c2rp00023g), 2012-01-01
Supplement: c2rp00023g_7.pdf [file c2rp00023g_7.pdf]

Student Survey Free Responses

**In what way has the use of the rubrics assisted your learning**

Made me think both objectively and subjectively about the research projects. Was able to learn from other students work.  
Using the standard EMU writing rubric has given me something to check during the paper editing process. The science rubric used for the poster contests has not been as helpful, but I can see how they would helpful check lists for papers or oral report. Because posters can only hold so much info for visual appeal, I think they need a different rubric that refers to the intro, materials and methods, results, and discussion specifically  
Rubrics help because they clearly outline expectations and make it easy to obtain a good grade.  
Rubrics have lessened the uncertainty of grading in projects. Working within a rubric, more time can be spent on the project matter (and less time is spent worrying about the grade)  
It is like a checklist for my reports and I know what is expected of me  
When writing in the sciences, especially if it is a big report, I look at the rubric to make sure my writing aligns with the professor/science department's expectations  
they help create a direction of presenting material  
the rubrics were absolutely helpful for having a fleshed out description of what is expected. I think especially of the rubrics used for posters and how they highlight technicalities, but also the equal importance of connecting information in the content of human community  
Rubrics are a great help in knowing what exactly is supposed to be done for an assignment and knowing that I'm fulfilling not only class requirements but scientific community standards as well  
you can better understand requirements  
specific guidelines are readily available  
rubrics make it easier to channel learning and decrease stress about the grade  
clearly outline expectations and guidelines  
useful reference for writing labs; it shows what you need to include  
it hasn't really changed my learning. I only used it once, and I just focused on what the prof wanted.  
I didn't really use them, I just wrote the paper. Others liked them.  
they clearly identify the expectations for the assignments  
Clarify expectations

**In what way have the rubrics impeded your learning?**

Rubrics allow us students to know what our professors will be grading on; they are there to aid our learning. They impede when the rubric parts don't always apply to the certain projects (i.e. posters)  
Rubrics will often limit the assignment by placing too many restrictions. Creativity is hindered or ignored.  
In individual projects some rubric criteria do not apply and can confine the extent of inquiry  
none that I can think of  
Sometimes we just write to satisfy the rubric  
I have found rubrics helpful, and can't think of any draw backs  
sometimes I feel a rubric can close your thought process into a box and prevents thinking outside of it  
they take away from the learning the overall picture of the subject. There are so many rules and guidelines that you can't be as creative  
the rubrics are so long and detailed that I often just glance through them anyway  
rubrics confine the scope of investigation in inquiry  
parts of the rubric are complicated and don't always relate to the project  
does not impede learning  
hasn't impeded  
rubrics have focused my attention on select topics that are most important, impeding my learning of anything else

**Do you have any other comments on the use of these rubrics in our teaching and their impact on our courses? Please share what you can.**

Some of the rubric grading components seemed redundant or not applicable to all posters/presentations  
Rubrics are good but should be used in a way so to not pigeon-hole work into fitting the 'perfect paper'. Also, upon grading, rubrics tend to leave unanswered questions. I often find myself wondering why I received a certain score in one area due to a lack of explanation.  
Rubrics are a useful evaluation tool. The only downside is that they are sometimes not general enough to accommodate (appreciate) all the components of individualized projects.  
  
We've only used the attached rubric once, and it was peer review. It wasn't all that helpful. So, it's difficult to judge the effectiveness of a rubric compared to other courses not using them. I feel that a general expectation for lab write ups/ reports is sufficient, and this is clear in the syllabus of every science course' they are definitely helpful  
sometimes they seem so general. The work "clearly" is overused, but its sometimes hard to know how clear or detailed is too much.  
well worth the time!  
The rubrics are helpful, absolutely! I think the usefulness gets watered down when professors do not think too much about their match with a particular assignment when they are distributed  
helpful for occasional big projects, but not for routine small projects  
its very helpful to have expectations clearly laid out. Whether that is through the CCLI rubrics or not doesn't make that much difference to me because these courses involve material which the students are unfamiliar, rubrics help focus and ease the study of the material  
rubrics may reduce creativity, but this might not matter as much in science courses which require more structure  
they are helpful for writing assignments in chemistry  
I remember general chem I being a fun class!
