# Supplementary material for: Measuring beyond content: a rubric bank for assessing skills in authentic research assignments in the sciences
Source: Royal Society of Chemistry journal article supplement (doi:10.1039/c2rp00023g), 2012-01-01
Supplement: c2rp00023g_8.pdf [file c2rp00023g_8.pdf]

Student Survey Responses

| # | Item                                                                                                                                        | <u>1</u> | <u>2</u> | <u>3</u> | <u>4</u> | <u>5</u> | <u>6</u> | <u>7</u> | <u>8</u> | <u>9</u> | <u>10</u> | <u>11</u> | <u>12</u> | <u>13</u> | <u>14</u> | <u>15</u> | <u>16</u> | <u>17</u> | <u>18</u> | <u>19</u> | <u>20</u> | Mean | Stdev | 2+   | <u>1</u> | ttest |
|---|---------------------------------------------------------------------------------------------------------------------------------------------|----------|----------|----------|----------|----------|----------|----------|----------|----------|-----------|-----------|-----------|-----------|-----------|-----------|-----------|-----------|-----------|-----------|-----------|------|-------|------|----------|-------|
| 1 | Research assignments that used the rubrics were returned graded faster than similar assignments in other science courses                    | 4        | 3        | 5        | 4        | 3        | 3        | 3        | 4        | 5        | 3         | 5         | 3         | 3         | 4         | 4         | 4         | 2         | 3         | 3         | 3         | 3.55 | 0.83  | 3.75 | 3.25     | 0.175 |
| 2 | The assignments that used the rubrics provided better feedback than similar assignments in other science courses                            | 3        | 2        | 2        | 4        | 3        | 3        | 3        | 5        | 4        | 3         | 4         | 4         | 4         | 4         | 3         | 4         | 3         | 3         | 4         | 4         | 3.45 | 0.76  | 3.33 | 3.63     | 0.367 |
| 3 | The assignments that used the rubrics fostered more reflection on my own learning than similar assignments in other science courses         | 2        | 5        | 2        | 4        | 3        | 2        | 4        | 4        | 3        | 4         | 4         | 4         | 4         | 5         |           | 3         | 3         | 3         | 4         | 3         | 3.47 | 0.90  | 3.42 | 3.57     | 0.713 |
| 4 | I prefer courses that use the rubrics to courses that do not                                                                                | 2        | 4        | 2        | 4        | 3        | 2        | 5        | 3        | 4        | 3         | 5         | 3         | 4         | 4         | 4         | 3         | 4         | 3         | 5         | 4         | 3.55 | 0.94  | 3.33 | 3.88     | 0.175 |
| 5 | Because of my professors' use of rubrics, the research products that I produce (e.g. papers, oral presentations, and posters) have improved | 4        | 4        | 4        | 5        | 4        | 3        | 4        | 5        | 4        | 2         | 5         | 4         | 4         | 5         | 3         | 3         | 2         | 3         | 5         | 2         | 3.75 | 1.02  | 4.00 | 3.38     | 0.224 |
| 6 | Because of my professors' use of rubrics, I experience greater anxiety over my research assignments than in other science courses           | 2        | 3        | 2        | 2        | 4        | 3        | 1        | 1        | 3        | 3         | 2         | 2         | 4         | 5         | 2         | 3         | 4         | 3         | 2         | 4         | 2.75 | 1.07  | 2.33 | 3.38     | 0.039 |
| 7 | Because of my professors' use of rubrics, I more clearly understand my professor's teaching objectives                                      | 4        | 5        | 5        | 5        | 4        | 4        | 4        | 4        | 4        | 4         | 5         | 5         | 4         | 4         | 4         | 4         | 3         | 3         | 5         | 2         | 4.10 | 0.79  | 4.42 | 3.63     | 0.051 |
| 8 | Because of my professors' use of the rubrics, I have a better awareness of my own ability to learn material and the ways in which I learn   | 4        | 4        | 2        | 4        | 2        | 3        | 4        | 3        | 2        | 2         | 4         | 4         | 4         | 5         | 2         | 3         | 2         | 3         | 5         | 3         | 3.25 | 1.02  | 3.17 | 3.38     | 0.684 |
| 9 | Because of my professors' use of the rubrics, I better understand the scientific concepts involved in the research project                  | 5        | 3        | 4        | 4        | 3        | 3        | 4        | 5        | 3        | 4         | 4         | 3         | 4         | 5         | 3         | 4         | 2         | 3         | 5         | 2         | 3.65 | 0.93  | 3.75 | 3.50     | 0.610 |

Student Survey Responses

|    |                                                                                                                                             |   |   |   |   |   |   |   |   |   |   |   |   |   |   |   |   |   |   |   |      |      |      |      |       |       |
|----|---------------------------------------------------------------------------------------------------------------------------------------------|---|---|---|---|---|---|---|---|---|---|---|---|---|---|---|---|---|---|---|------|------|------|------|-------|-------|
| 10 | Because of my professors' use of the rubrics, I have better higher order cognitive skills (analysis, synthesis, application and evaluation) | 5 | 3 | 2 | 4 | 3 | 3 | 4 | 4 | 4 | 3 | 5 | 3 | 3 | 5 | 4 | 2 | 3 | 4 | 3 | 3.53 | 0.90 | 3.58 | 3.43 | 0.738 |       |
| 11 | Because of my professors' use of the rubrics, I have a better understanding of the 'nature of science'                                      | 5 | 4 | 2 | 4 | 3 | 3 | 4 | 5 | 5 | 4 | 4 | 3 | 3 | 4 | 2 | 4 | 4 | 3 | 3 | 2    | 3.55 | 0.94 | 3.83 | 3.13  | 0.095 |
| 12 | Because of my professors' use of the rubrics, I have improved in my scientific communication skills (for example, I write better)           | 4 | 4 | 3 | 4 | 3 | 3 | 3 | 4 | 4 | 3 | 5 | 4 | 3 | 4 | 3 | 4 | 1 | 3 | 4 | 2    | 3.40 | 0.88 | 3.67 | 3.00  | 0.144 |
| 13 | The use of the rubrics has improved EMU's overall undergraduate science program                                                             | 4 | 4 | 3 | 4 | 4 | 3 | 4 | 4 | 5 | 3 | 5 | 4 | 3 | 4 | 4 | 4 | 4 | 3 | 5 | 4    | 3.90 | 0.64 | 3.92 | 3.88  | 0.890 |
| 14 | The use of the rubrics has improved my learning                                                                                             | 4 | 4 | 3 | 4 | 3 | 3 | 4 | 5 | 5 | 3 | 5 | 4 | 4 | 4 | 3 | 4 | 2 | 3 | 4 | 3    | 3.70 | 0.80 | 3.92 | 3.38  | 0.140 |
| 15 | The use of the rubrics has hindered my learning                                                                                             | 2 | 2 | 3 | 2 | 3 | 3 | 2 | 1 | 3 | 3 | 2 | 2 | 3 | 1 | 1 | 2 | 1 | 3 | 1 | 3    | 2.15 | 0.81 | 2.33 | 1.88  | 0.273 |
| 16 | I am grateful for the rubrics                                                                                                               | 4 | 4 | 4 | 4 | 3 | 3 | 4 | 4 | 4 | 4 | 5 | 5 | 4 | 4 | 4 | 4 | 3 | 3 | 5 | 3    | 3.90 | 0.64 | 4.00 | 3.75  | 0.426 |
| 17 | I fail to see the reason for using rubrics                                                                                                  | 2 | 1 | 2 | 2 | 5 | 2 | 1 | 2 | 1 | 2 | 2 | 1 | 1 | 1 | 2 | 2 | 4 | 3 | 1 | 2    | 1.95 | 1.05 | 1.92 | 2.00  | 0.867 |
|    | # of courses                                                                                                                                | 2 | 2 | 3 | 3 | 2 | 2 | 2 | 3 | 3 | 2 | 3 | 3 | 1 | 1 | 1 | 1 | 1 | 1 | 1 | 1    | 1.90 | 0.85 | 2.50 | 1.00  | 3E-06 |

(Directions) Likert Items: Rate the following using the scale: 5 = strongly agree, 4 = agree, 3 = neither agree nor disagree, 2 = disagree, and 1 = strongly disagree (leave item blank if it doesn't apply):
